# Supplementary material for: Survival of Older Patients With Advanced CKD Managed Without Dialysis: A Narrative Review
Source: PubMed Central journal article supplement — Kidney Med. 2022 Mar 12;4(5):100447. doi: 10.1016/j.xkme.2022.100447 (PMC9046625; doi:10.1016/j.xkme.2022.100447), 2022-03-12
Supplement: mmc1.pdf [file mmc1.pdf]

**Item S1.** Search terminology:

- Survival
- Mortality
- Elderly
- Older patients
- Chronic Kidney Disease
- End Stage Kidney Disease
- Kidney failure
- Renal Replacement Therapy
- Dialysis
- Conservative Kidney Management
- Conservative Management
- Conservative Care
- Supportive Care
- Non-dialysis pathway
- Kidney palliative care

Studies were sequentially screened from MEDLINE, EMBASE, Pubmed, University of Sydney Library and Cochrane Library databases.
